# Supplementary material for: TcbHLH14 a Jasmonate Associated MYC2-like Transcription Factor Positively Regulates Pyrethrin Biosynthesis in Tanacetum cinerariifolium
Source: MDPI journal article supplement (doi:10.3390/ijms24087379), 2023-04-17
Supplement: s1 [file s1]

## Supplemental information

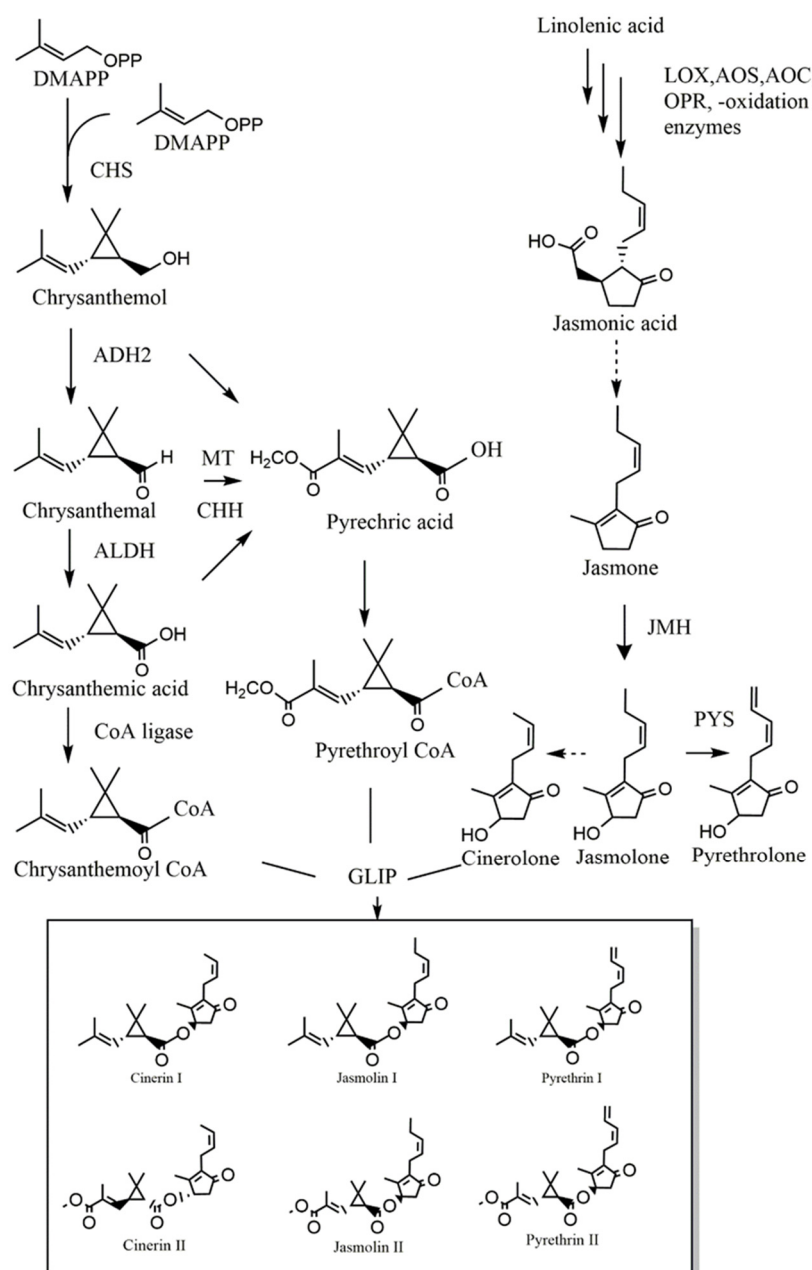

**Figure S1. The biosynthesis pathway of pyrethrins**

The solid box encloses the six major pyrethrins. Abbreviations: ADH2, alcohol dehydrogenase2; ALDH, aldehyde dehydrogenase; CHH, chrysanthemol 10-hydroxylase; CHS, chrysanthemol synthase; GLIP, GDSL lipase-like protein; JMH, jasmolone hydroxylase; MT, 10-carboxychrysanthemic acid 10-methyltransferase; PYS, pyrethrolone synthase.

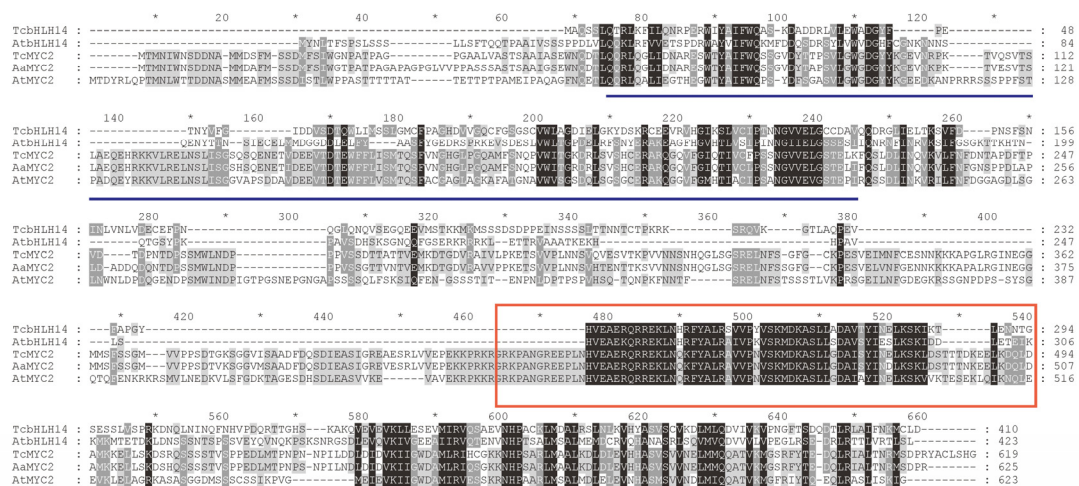

**Figure S2. Multiple amino acid sequence alignment of TcbHLH14 and bHLH\_MYC proteins of other plants.**  
 Consistent sequences are marked in white text with a black background. The HLH domain is boxed in pink and the bHLH-MYC\_N domain is lined in blue. TcbHLH14 is marked with a red triangle.

**Table S1. Content of pyrethrins in leaves after transient overexpression of TcbHLH14 for 4 days.**

| Pyrethrins       | OE             |       |             |            | CK             |       |             |            |
|------------------|----------------|-------|-------------|------------|----------------|-------|-------------|------------|
|                  | Retention time |       | Peak area   |            | Retention time |       | Peak area   |            |
|                  | Time           | SD    | Area        | SD         | Time           | SD    | Area        | SD         |
| Cinerin II       | 7.973          | 0.004 | 432303.667  | 20029.579  | 7.998          | 0.003 | 380037.667  | 8737.604   |
| Pyrethrin II     | 8.675          | 0.005 | 1508409.333 | 62410.078  | 8.695          | 0.005 | 1707882.667 | 39671.574  |
| Jasmolin II      | 10.029         | 0.006 | 143267.333  | 6197.035   | 10.101         | 0.004 | 150520.667  | 3355.006   |
| Cinerin I        | 14.725         | 0.049 | 336471.667  | 23964.212  | 14.785         | 0.019 | 188701.000  | 11726.579  |
| Pyrethrin I      | 16.184         | 0.022 | 2722187.333 | 107978.294 | 16.244         | 0.015 | 2480796.000 | 55588.480  |
| Jasmolin I       | 19.039         | 0.026 | 43336.667   | 4516.825   | 19.069         | 0.016 | 21074.667   | 610.786    |
| Total pyrethrins | /              | /     | 5185976.000 | 219383.699 | /              | /     | 4929012.667 | 107652.998 |

**Table S2. Content of pyrethrins in leaves after transient silencing of TcbHLH14.**

| Pyrethrins       | VIGS           |       |             |            | CK             |       |             |            |
|------------------|----------------|-------|-------------|------------|----------------|-------|-------------|------------|
|                  | Retention time |       | Peak area   |            | Retention time |       | Peak area   |            |
|                  | Time           | SD    | Area        | SD         | Time           | SD    | Area        | SD         |
| Cinerin II       | 8.010          | 0.001 | 113512.333  | 2809.189   | 8.010          | 0.003 | 230706.333  | 10006.899  |
| Pyrethrin II     | 8.692          | 0.007 | 900216.667  | 24653.002  | 8.683          | 0.001 | 1714069.333 | 46990.546  |
| Jasmolin II      | 10.056         | 0.007 | 55185.667   | 4682.275   | 10.020         | 0.005 | 100661.000  | 5917.866   |
| Cinerin I        | 14.790         | 0.021 | 57306.667   | 6864.298   | 14.806         | 0.027 | 60465.667   | 6122.550   |
| Pyrethrin I      | 16.271         | 0.013 | 1099836.333 | 105169.763 | 16.268         | 0.012 | 1585931.667 | 75813.527  |
| Jasmolin I       | 19.178         | 0.005 | 22940.000   | 3082.619   | 19.188         | 0.026 | 24927.000   | 2799.476   |
| Total pyrethrins | /              | /     | 2248997.667 | 130755.696 | /              | /     | 3716761.000 | 134269.885 |

**Table S3. Primers used in this study.**

| ID                          | Primer name               | Primer sequences(5' to 3')                             |
|-----------------------------|---------------------------|--------------------------------------------------------|
| Cloning                     | TcbHLH14_F                | ATGGCACAATCCTCTCTTCAAAC                                |
| Cloning                     | TcbHLH14_R                | TTAATCCAAGCACATTTTGTTAA                                |
| Realtime PCR                | TcGAPDH_RT_F              | AAGGAGGAATCTGAAGGAAAGCTG                               |
| Realtime PCR                | TcGAPDH_RT_R              | GTGTGTTGTTCAAAGCGATTCCAGC                              |
| Realtime PCR                | TcbHLH14_RT_F             | GCACTTAGGAGCGTAGTTCCATAC                               |
| Realtime PCR                | TcbHLH14_RT_R             | TTGATTGATGTTCAGTTGGTTGTCC                              |
| Realtime PCR                | TcCHS_RT_F                | ACGTGCATCTTCTGGACCTCTTC                                |
| Realtime PCR                | TcCHS_RT_R                | TGAACAATCCGACGGTTAAGAGTC                               |
| Realtime PCR                | TcGLIP_RT_F               | GCCGGGAATGCGAGCAAAACAAC                                |
| Realtime PCR                | TcGLIP_RT_R               | CGCTCTCGCCTTCCTTAAACCATA                               |
| Realtime PCR                | TcALDH_RT_F               | CATTCCGCTACTTTGCTGGTGC                                 |
| Realtime PCR                | TcALDH_RT_R               | TCCAAGGAATGATGTGTCCAACCTAC                             |
| Realtime PCR                | TcAOC_RT_F                | TTCAAGGCGCATACATCACAACCT                               |
| Realtime PCR                | TcAOC_RT_R                | GTCACCGGGGTAACATAACAACCTCA                             |
| linking to pGADT7           | TcbHLH14_pGADT7_F         | gtaccagattacgcTcatatgATGGCACAATCCTCTCTTCAAAC           |
| linking to pGADT7           | TcbHLH14_pGADT7_R         | acgatTcaTctgcagcTcgagTTAATCCAAGCACATTTTGTTAAAAAT       |
| linking to pHis2.1          | TcAOC_pHis2.1_F           | gactcactatagggcggaattcTATTTAACTTGTATATATACATGGGTTGAAGC |
| linking to pHis2.1          | TcAOC_pHis2.1_R           | attactagtggtaccacgcgTAGTTGTTAAGATTTGTTTTAATGTTTAATGC   |
| linking to pHis2.1          | TcGLIP_pHis2.1_F          | gactcactatagggcggaattcAACTAGAAGCAAAGATCATCGTACTTC      |
| linking to pHis2.1          | TcGLIP_pHis2.1_R          | attactagtggtaccacgcgTAGCTTATATGTGCTCAGACAAGAGGT        |
| linking to pSuper1300GFP    | TcbHLH14-pS1300-F         | gggccccgggTcgacatttaaatATGGCACAATCCTCTCTTCAAAC         |
| linking to pSuper1300GFP    | TcbHLH14-pS1300-R         | gcccttgcTcaccatggtaccATCCAAGCACATTTTGTTAAAAATCG        |
| linking to pGreenIIISK62    | TcbHLH14_SK62_F           | caggaattcgatatcaagcttATGGCACAATCCTCTCTTCAAAC           |
| linking to pGreenIIISK62    | TcbHLH14_SK62_R           | gtcgacgggtatcgataagcttTTAATCCAAGCACATTTTGTTAA          |
| linking to pGreenII0800-LUC | TcAOC_pGreenII0800-LUC_F  | gtcgacgggtatcgataagcttTATTTAACTTGTATATATACATGGGTTGAAGC |
| linking to pGreenII0800-LUC | TcAOC_pGreenII0800-LUC_R  | caggaattcgatatcaagctTAGTTGTTAAGATTTGTTTTAATGTTTAATGC   |
| linking to pGreenII0800-LUC | TcGLIP_pGreenII0800-LUC_F | gtcgacgggtatcgataagcttAACTAGAAGCAAAGATCATCGTACTTC      |
| linking to pGreenII0800-LUC | TcGLIP_pGreenII0800-LUC_R | caggaattcgatatcaagctTAGCTTATATGTGCTCAGACAAGAGGT        |
| linking to pET28a           | TcbHLH14_pET28a_F         | cagcaaatgggTcgcggaTccATGGCACAATCCTCTCTTCAAACCCG        |
| linking to pET28a           | TcbHLH14_pET28a_R         | gtggtggtggtggtgcTcgagATCCAAGCACATTTTGTTAAAAATCGCAAG    |
| Probes used in EMSA         | Probe_GLIP_F              | CCTGACAGTTGCTATTTAGTGCTGTCTACTTGTAGTTGTGGAGCAAATGACT   |
| Probes used in EMSA         | Probe_GLIP_R              | AGTCATTTGCTCCACAACATAACAAGTAGACAGCACTAAATAGCAACTGTCAGG |
| Probes used in EMSA         | Probe_AOC_F               | CAACTAATCACACACCGCCACGTGTCCACCGTCCACCTACT              |
| Probes used in EMSA         | Probe_AOC_R               | AGTAGGTGGACGGTGGACACGTGGCGGTGTGTGATTAGTTG              |
| Probes used in EMSA         | mProbe_AOC_F              | CAACTAATCACACACCGCTCTTCTTCCACCGTCCACCTACT              |
| Probes used in EMSA         | mProbe_AOC_R              | AGTAGGTGGACGGTGAAGAAGAGCGGTGTGTGATTAGTTG               |
| Probes used in EMSA         | mProbe_GLIP_F             | CCTGATCTCGTCTATTTAGTGCTGTCTACTTGTAGTTGTGGAGTCCCGTACT   |
| Probes used in EMSA         | mProbe_GLIP_R             | AGTACGGGACTCCACAACATAACAAGTAGACAGCACTAAATAGACGAGATCAGG |
| linking to pTRV2            | TcbHLH14_VIGS_F           | agaaggccTccatggggaTccGGACAACCAACTGAACATCAATCA          |
| linking to pTRV2            | TcbHLH14_VIGS_R           | cgtgagcTcggtaccggaTccTCGCAAGTCGTAAGGTGTCTTG            |
